# Supplementary material
Source: Springer Nature journal article supplement (https://www.springermedizin.de/resource/supplementary/12885_2013_4505_MOESM2_ESM.pdf/9466392)

Oral Cavity and Pharynx. Men

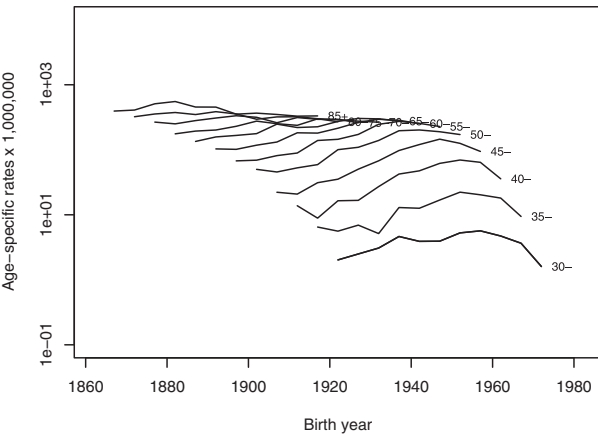

Oral Cavity and Pharynx. Women

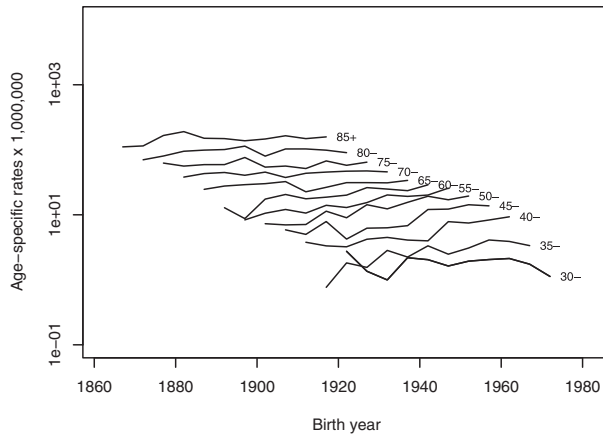

Esophagus. Men

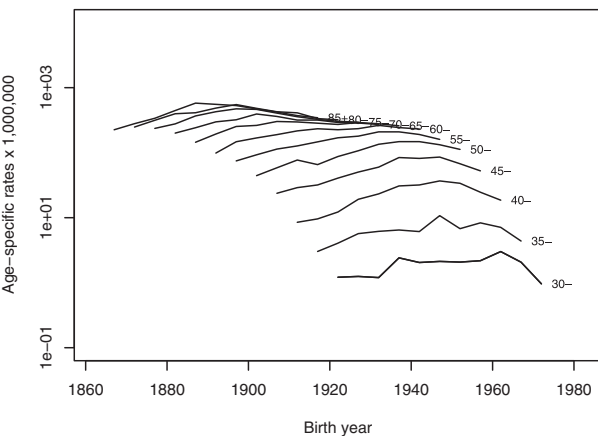

Esophagus. Women

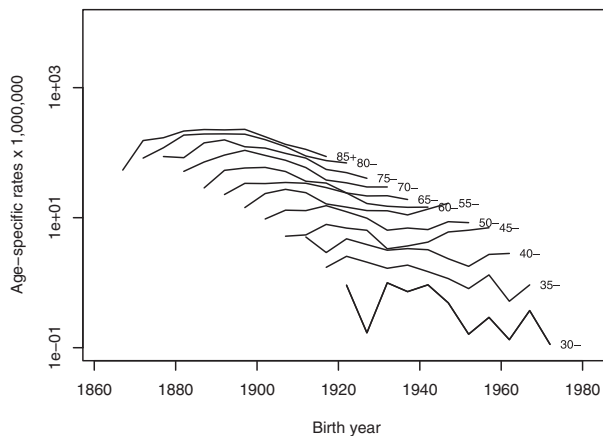

Stomach. Men

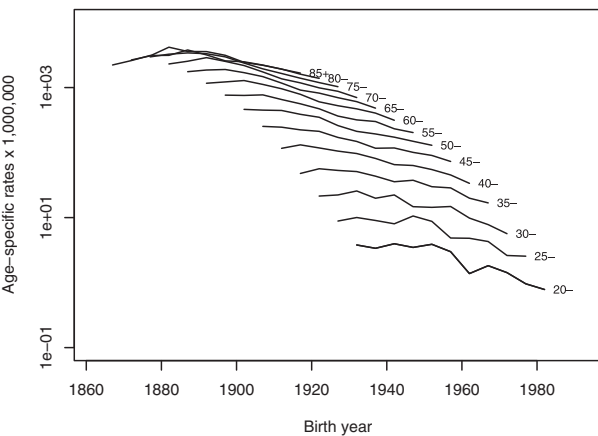

Stomach. Women

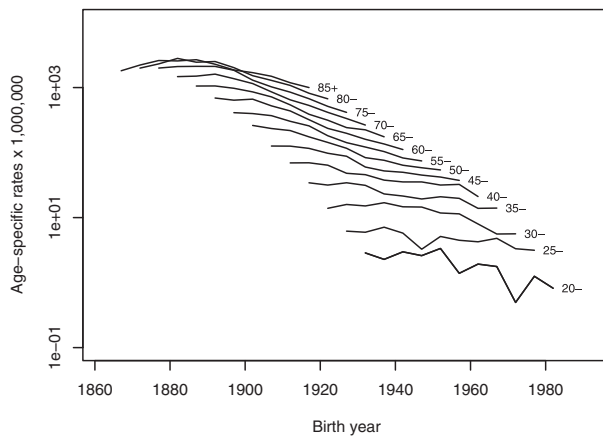

Supplement: MOESM2 [file 9466392]
